# Supplementary material for: Retrieving Tropospheric Temperature and Humidity Profiles Over the Ocean Using Buoy-Based Microwave Radiometers
Source: Copernicus journal article supplement (doi:10.5194/egusphere-2025-5270), 2025-12-05
Supplement: Supplementary file [file egusphere-2025-5270-AC1-supplement.pdf]

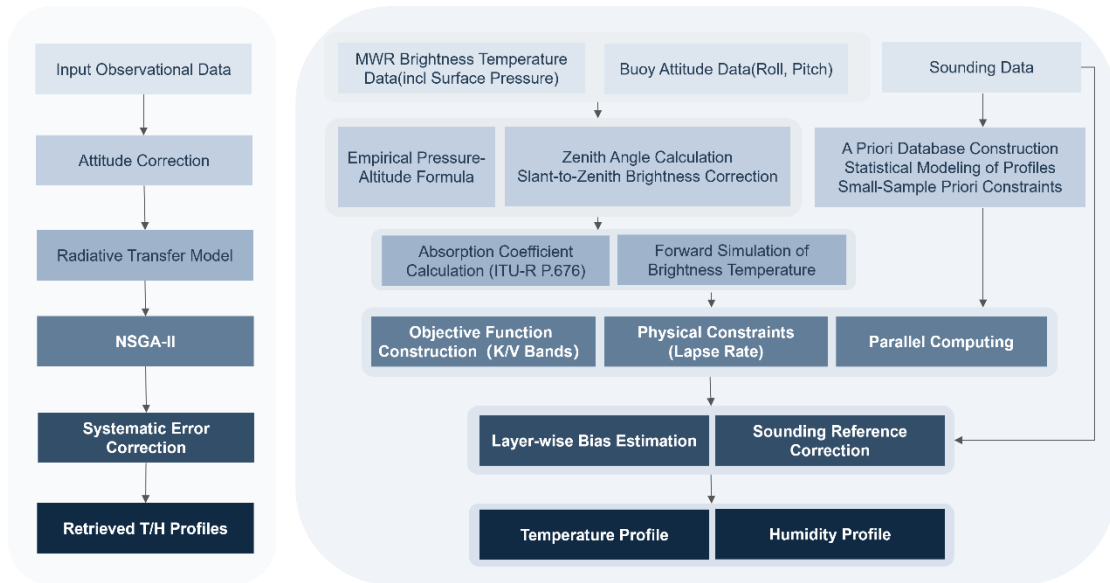

New Figure 4

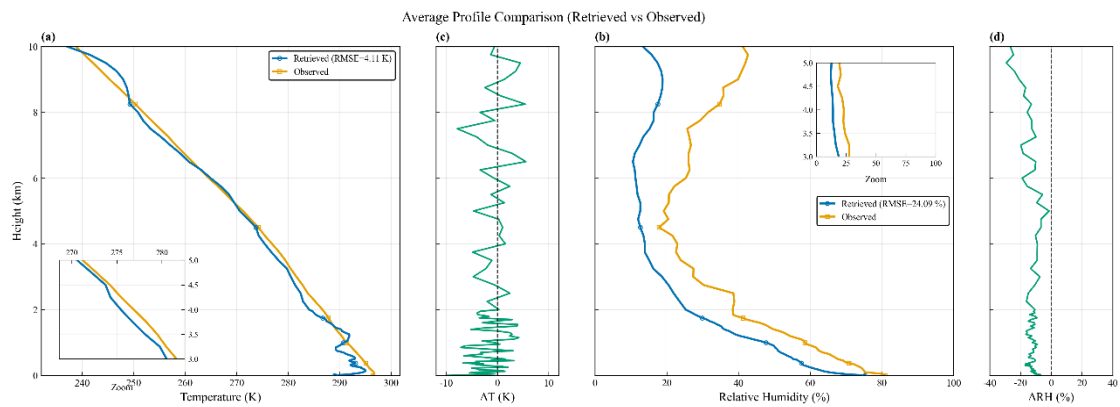

Revised Original Figure 4

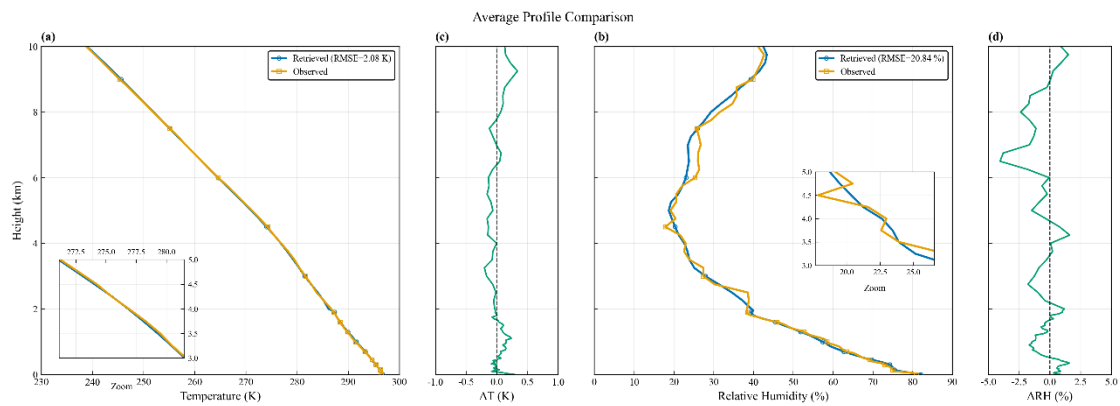

Revised Original Figure 5
